# Supplementary material for: GALNT2 promotes invasiveness of colorectal cancer cells partly through AXL
Source: PubMed Central journal article supplement (PMC9812829; doi:10.1002/1878-0261.13347), 2022-12-05
Supplement: MOL2-17-119-s001.pdf [file MOL2-17-119-s001.pdf]

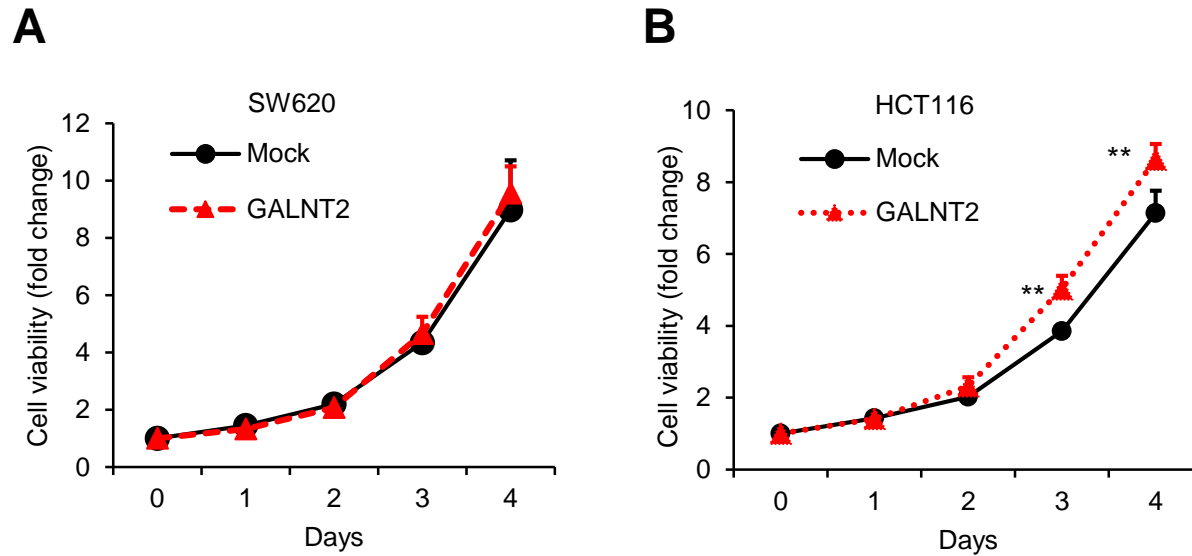

**Supplementary Figure S1. Effects of GALNT2 on cell viability using MTT assays. A.** Effects of GALNT2 overexpression on viability of SW620 cells. **B.** Effects of GALNT2 overexpression on viability of HCT116 cells. \*\* $P < 0.01$ .

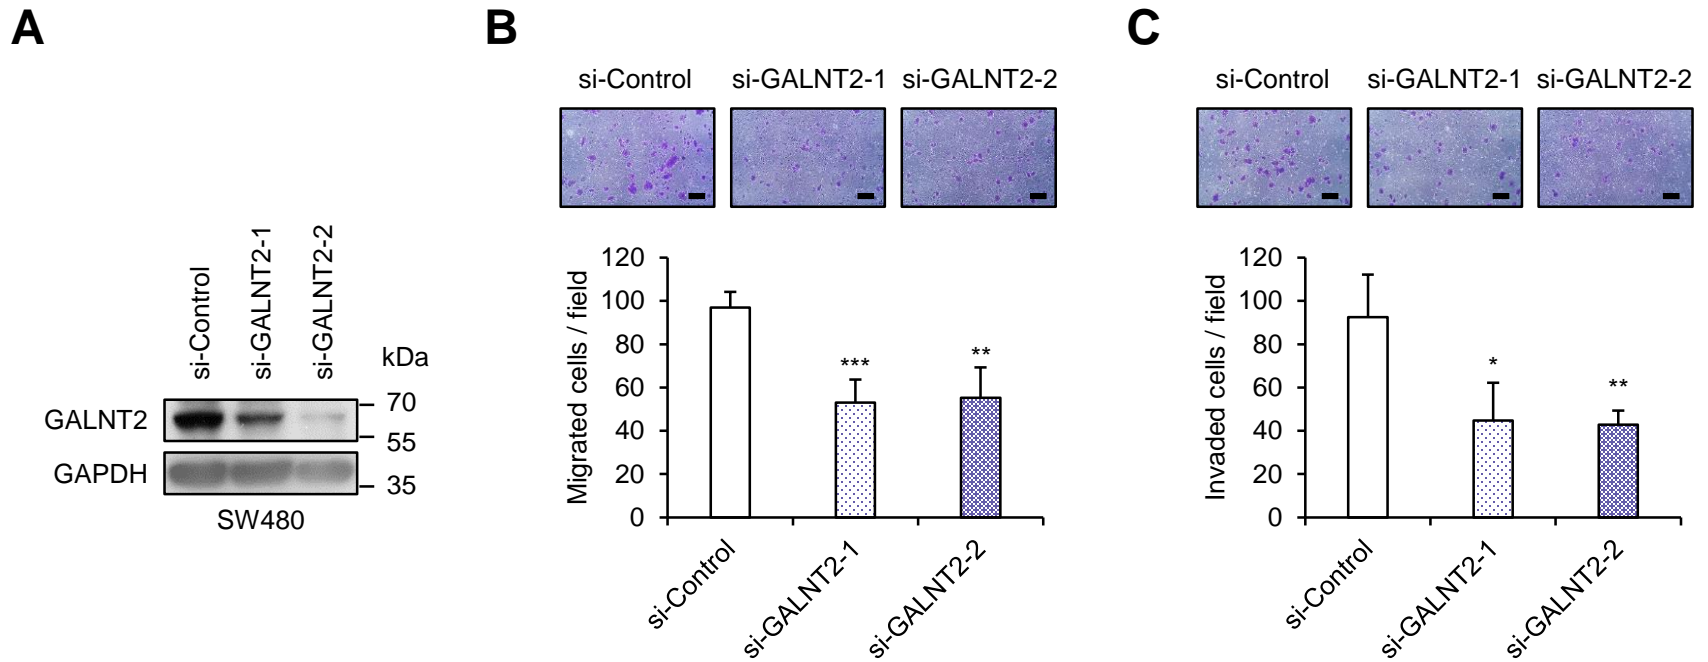

**Supplementary Figure S2. GALNT2 knockdown suppresses migration and invasion of SW480 cells.** **A.** Western blots showing knockdown of GALNT2 with siRNAs in SW480 cells. **B.** Cell migration was analyzed using transwell migration assay. **C.** Cell invasion was analyzed using Matrigel invasion assay. Cell migration and invasion were triggered by 10% FBS for 48h. Representative images were shown. Scale bar, 20  $\mu$ m. Data are presented as mean  $\pm$  SD. \* $P < 0.05$ , \*\* $P < 0.01$ , \*\*\* $P < 0.001$ .

**A**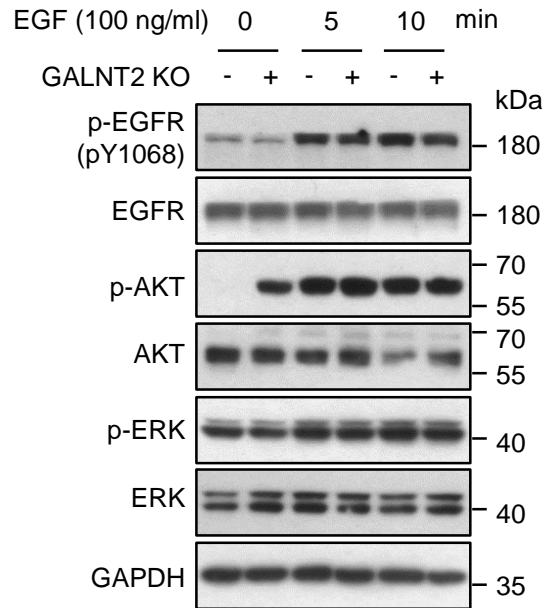**B**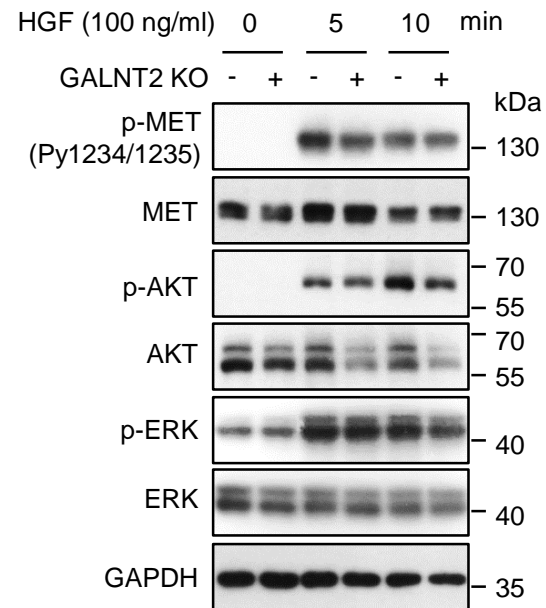

**Supplementary Figure S3. GALNT2 knockout weakly decreases phosphorylation of EGFR and MET.** **A.** Western blots showing effects of GALNT2 knockout on EGFR signaling. Parental and GALNT2 knockout (KO) HCT116 cells were starved overnight and then treated with 100 ng/ml EGF. **B.** Western blots showing effects of GALNT2 knockout on MET signaling. Parental and GALNT2 knockout (KO) HCT116 cells were starved overnight and then treated with 100 ng/ml HGF.

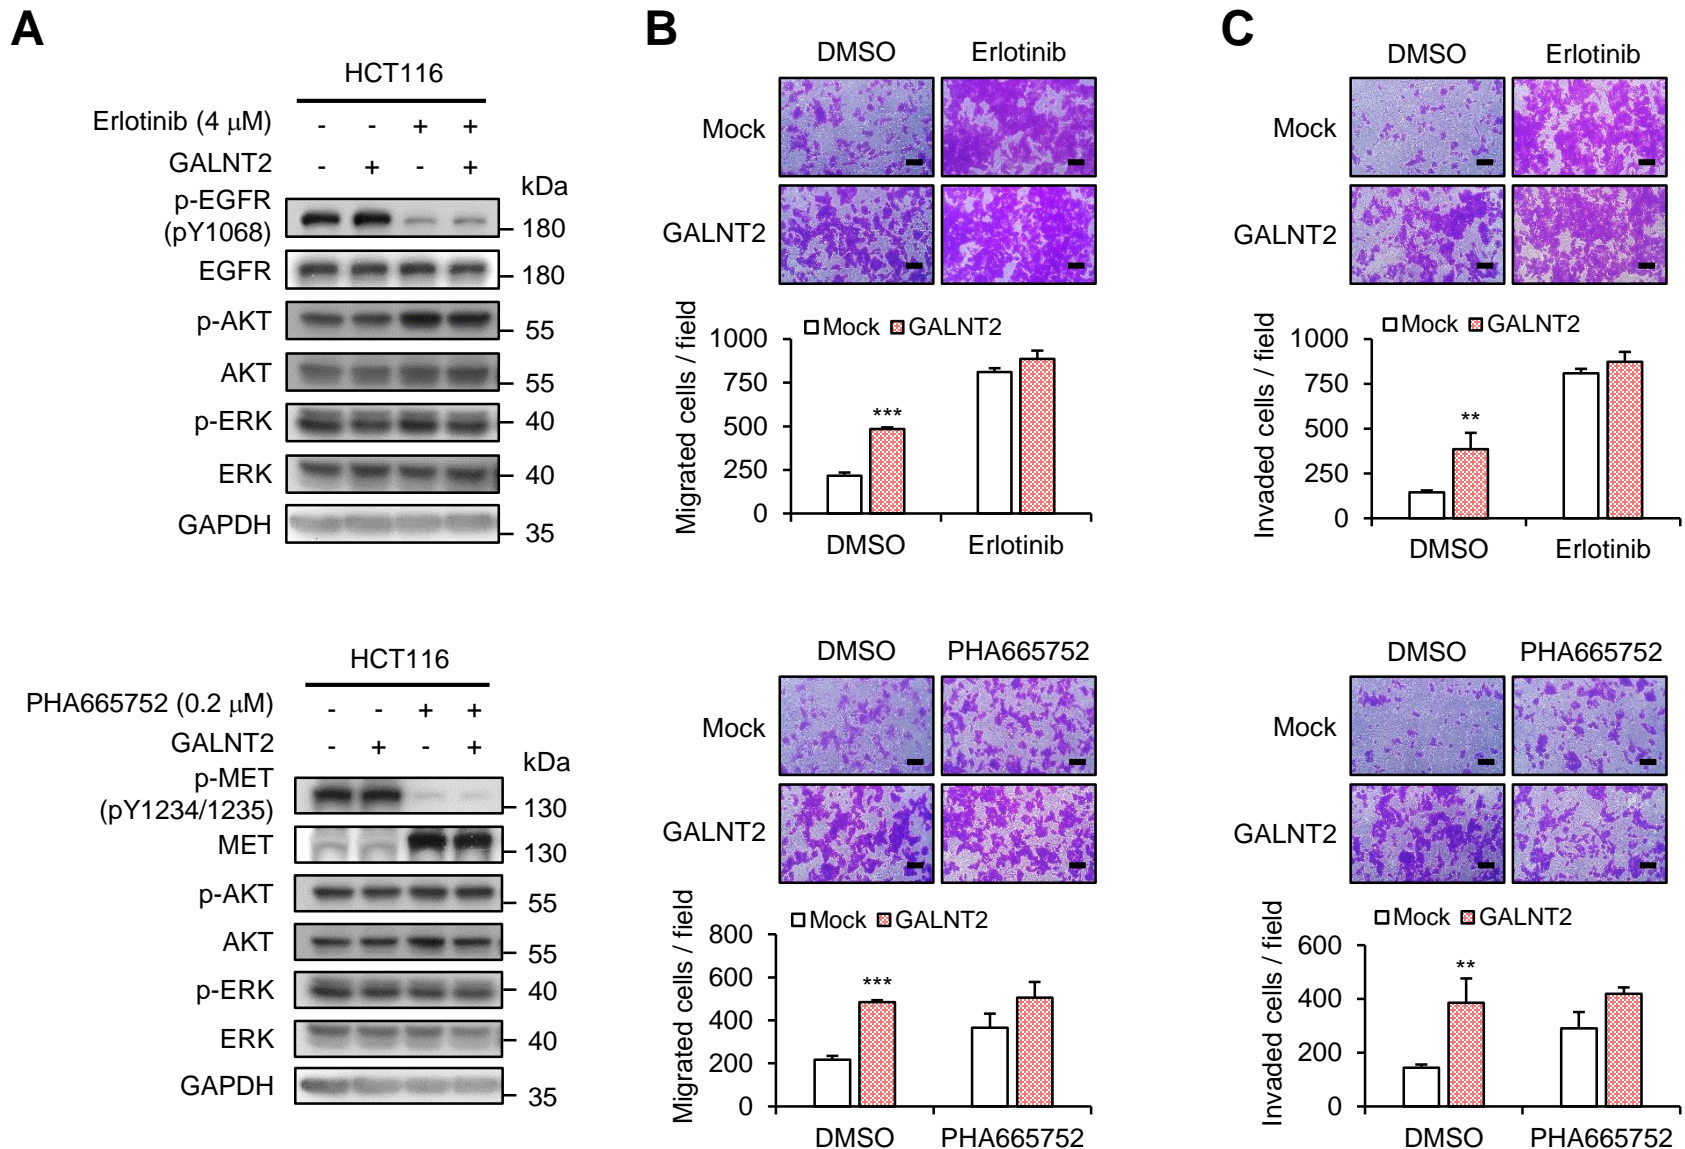

**Supplementary Figure S4. Inhibition of EGFR or MET activity cannot block GALNT2-mediated migration and invasion of HCT116 cells.** **A.** Western blots showing effects of erlotinib and PHA665752 on EGFR and MET phosphorylation and signaling, respectively. **B.** Transwell migration assay. **C.** Matrigel invasion assay. Cell migration and invasion were triggered by 10% FBS for 48h. Representative images were shown. Scale bar, 20  $\mu$ m. Data are presented as mean  $\pm$  SD. \*\* $P < 0.01$ , \*\*\* $P < 0.001$ .

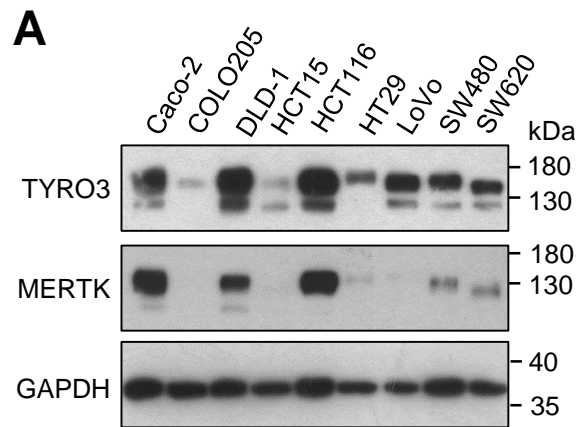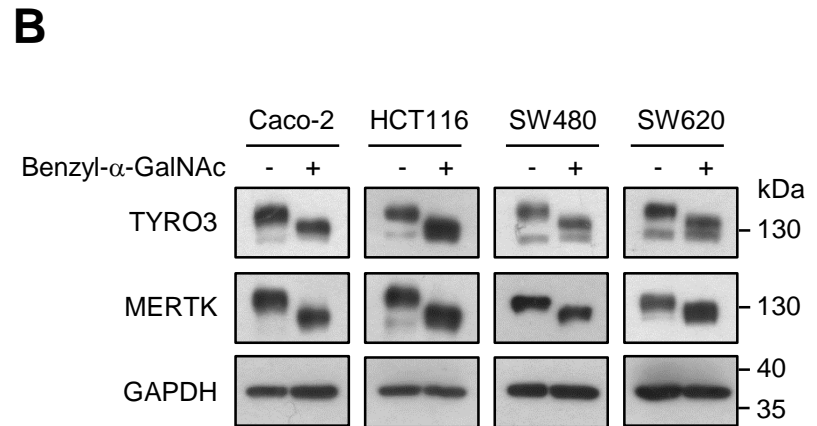

**Supplementary Figure S5. TYRO3 and MERTK carry GalNAc-type O-glycans. A.** Western blots showing expression of TYRO3 and MERTK in colon cancer cells. **B.** Western blots showing a dramatic decrease in the molecular weight of TYRO3 and MERTK in cells treated with O-glycan synthesis inhibitor 1 mM benzyl- $\alpha$ -GalNAc for 24 h.

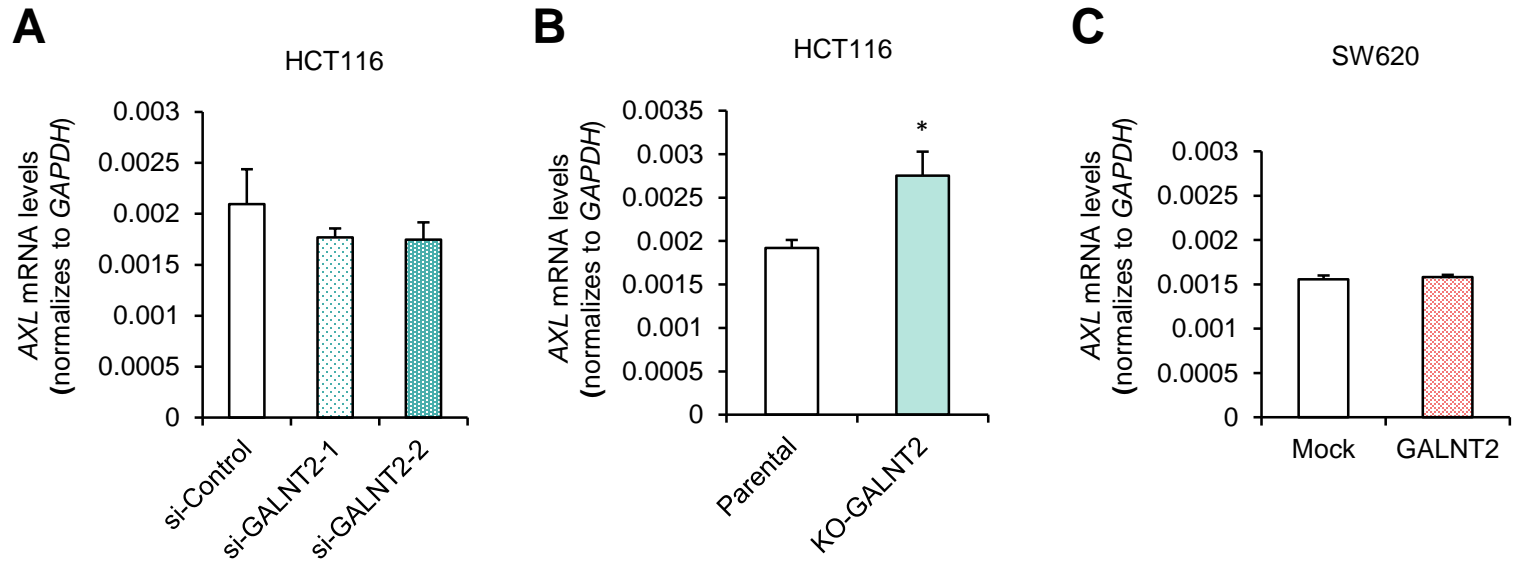

**Supplementary Figure S6. Real-time RT-PCR analysis showing effects of GALNT2 on AXL mRNA levels.** **A.** Effects of GALNT2 knockdown on AXL mRNA expression in HCT116 cells. **B.** Effects of GALNT2 knockout (KO) on AXL mRNA expression in HCT116 cells. **C.** Effects of GALNT2 knockdown on AXL mRNA expression in SW620 cells. \* $P < 0.05$ .

**A**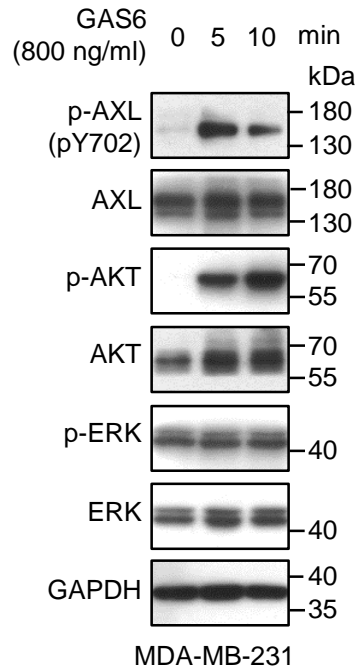**B**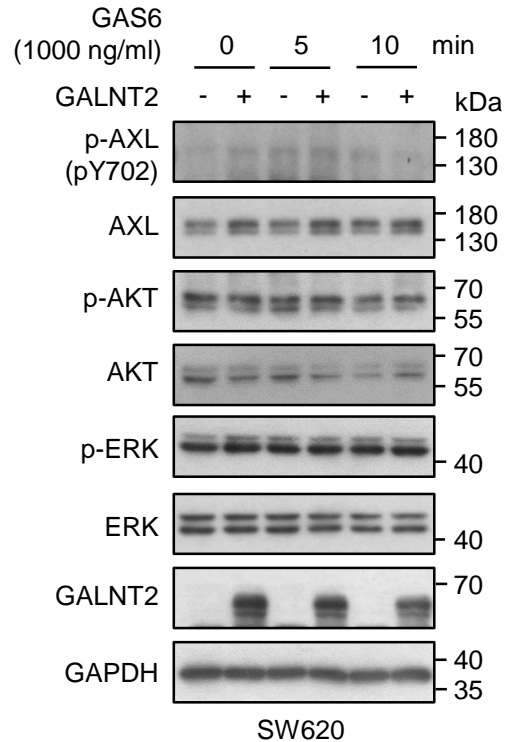

**Supplementary Figure S7. Effects of GALNT2 on GAS6-mediated phosphorylation of AXL. A.** Western blots showing GAS6-mediated phosphorylation of AXL in breast cancer cell line MDA-MB-231. All cells were starved overnight and then treated with GAS6 for different times, as indicated. **B.** Western blots showing effects of GALNT2 overexpression on GAS6-mediated phosphorylation of AXL in SW620 cells.

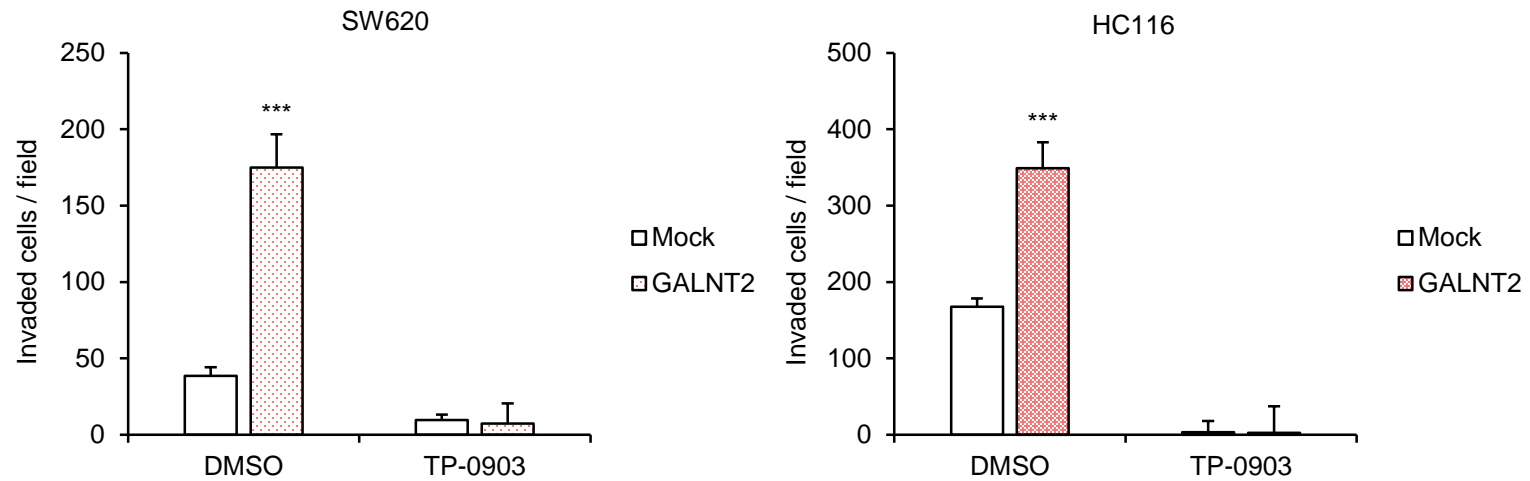

**Supplementary Figure S8. AXL inhibitor TP-0903 suppresses and reverses GALNT2- mediated invasion of colon cancer cells .** Mock or GALNT2 overexpressing SW620 and HCT116 cells were used. Cell invasion was triggered by 10% FBS together with DMSO solvent control or 3  $\mu$ M TP-0903, an AXL inhibitor, in the lower chamber for 48 h. \*\*\* $P < 0.001$ .



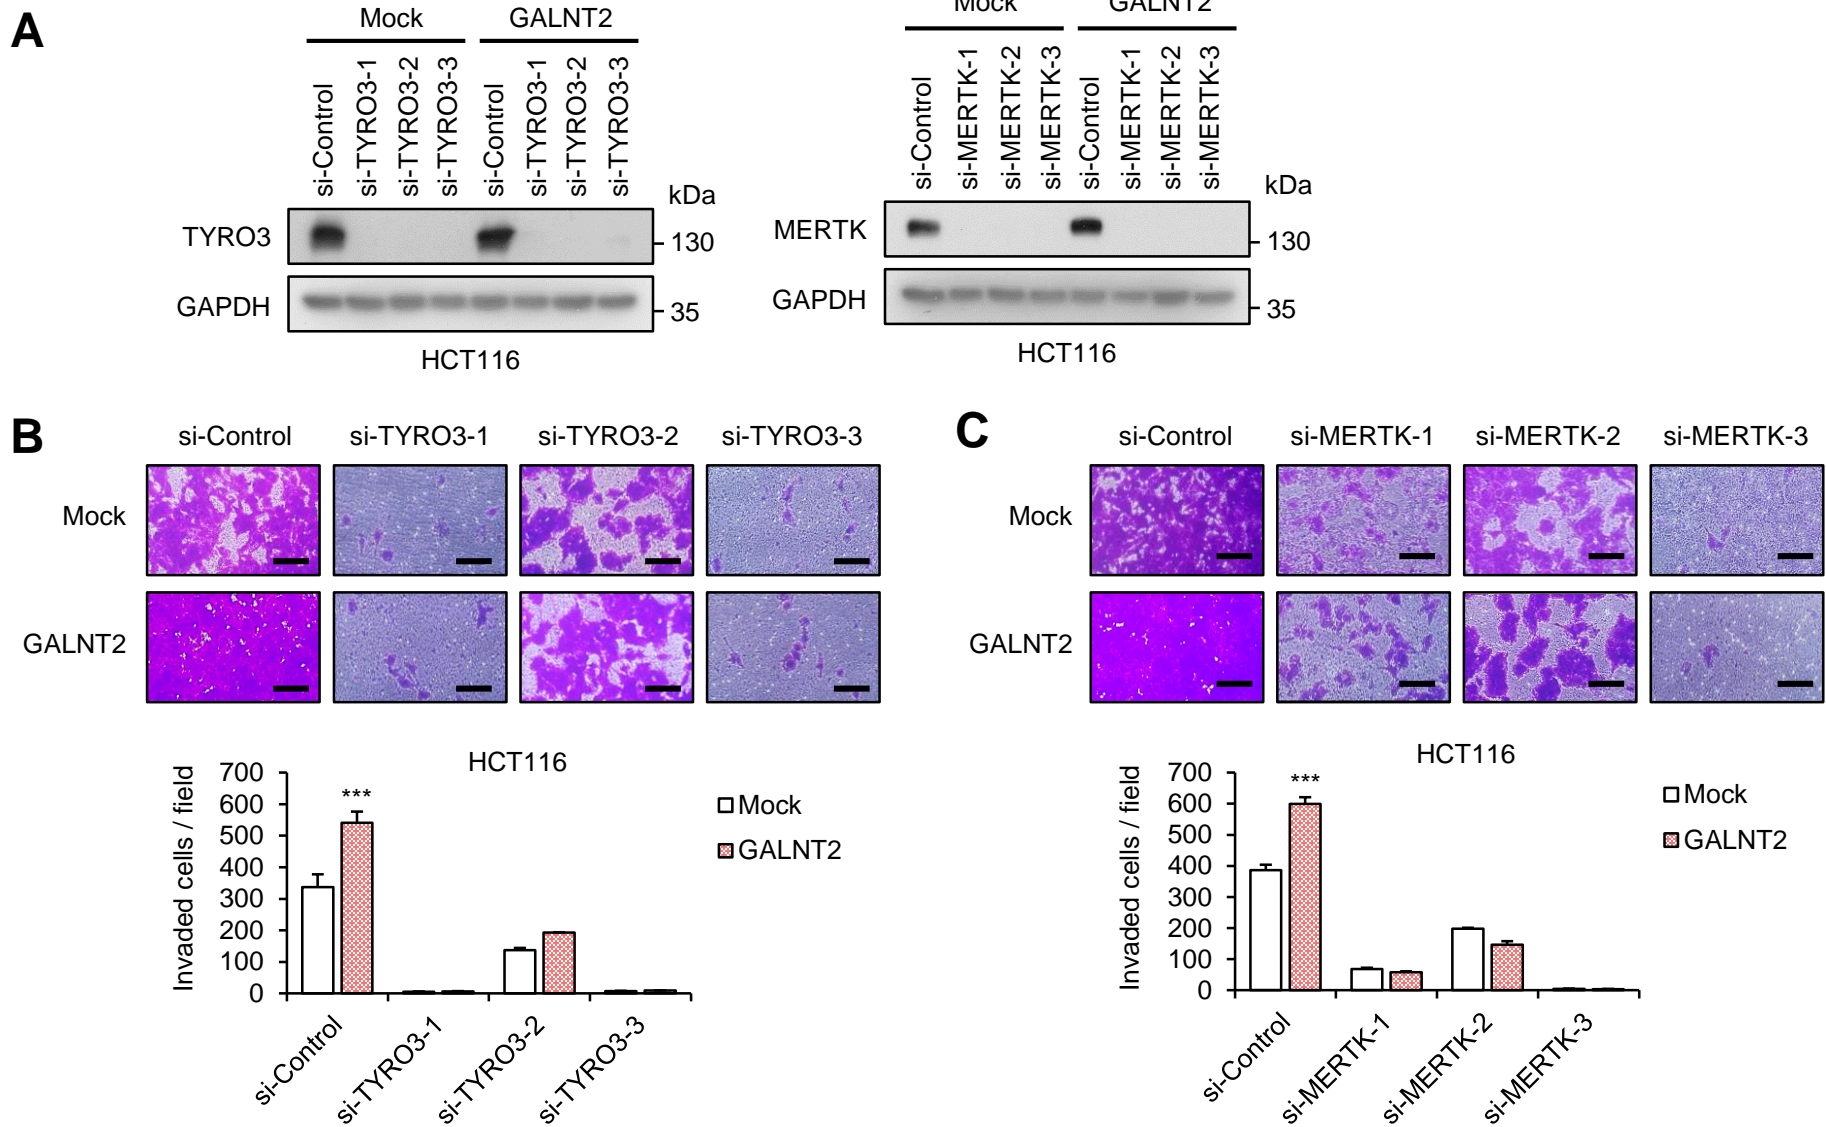

**Supplementary Figure S9. Effects of TYRO3 or MERTK knockdown on GALNT2-mediated invasion of HCT116 cells. A.** Western blots showing siRNA-mediated knockdown of TYRO3 or MERTK in HCT116 cells. **B.** Effects of TYRO3 knockdown on HCT116 cell invasion analyzed using Matrigel invasion assay. Representative images were shown.  $***P < 0.001$ . **C.** Effects of MERTK knockdown on HCT116 cell invasion analyzed using Matrigel invasion assay. Cell invasion was triggered by 10% FBS for 48h. Representative images were shown. Scale bar, 20  $\mu$ m. Data are presented as mean  $\pm$  SD.  $***P < 0.001$ .

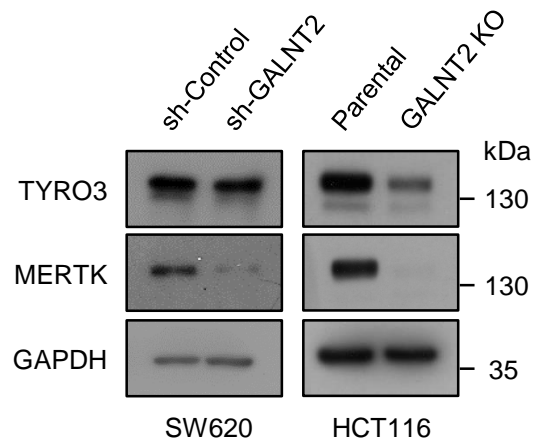

**Supplementary Figure S10. GALNT2 knockdown or knockout decreases TYRO3 and MERTK protein levels.**

Western blots showing expression of TYRO3 and MERTK in control or GALNT2 knockdown SW620 cells as well as parental or GALNT2 knockout (KO) HCT116 cells. GAPDH was an internal control.
